# Supplementary material
Source: publisher figshare collection journal article supplement (https://acs.figshare.com/ndownloader/files/23991107)
Supplement: Supplementary file 1 [file 23991107]

## Supporting Information

### *Operando* Synchrotron-Based X-Ray Study of Prussian Blue and Its Analogue as Cathode Materials for Sodium-Ion Batteries

*Jeesoo Seok<sup>†</sup>, Seung-Ho Yu<sup>\*,‡</sup>, and Héctor D. Abruña<sup>\*,†</sup>*

<sup>†</sup>Baker Laboratory, Department of Chemistry and Chemical Biology, Cornell University, Ithaca,  
New York, 14853, United States

<sup>‡</sup>Department of Chemical and Biological Engineering, Korea University, 145 Anam-ro,  
Seongbuk-gu, Seoul 02841, Republic of Korea

#### Corresponding Authors

S.-H. Yu (E-mail: seunghoyu@korea.ac.kr), H. D. Abruña (E-mail: hda1@cornell.edu)

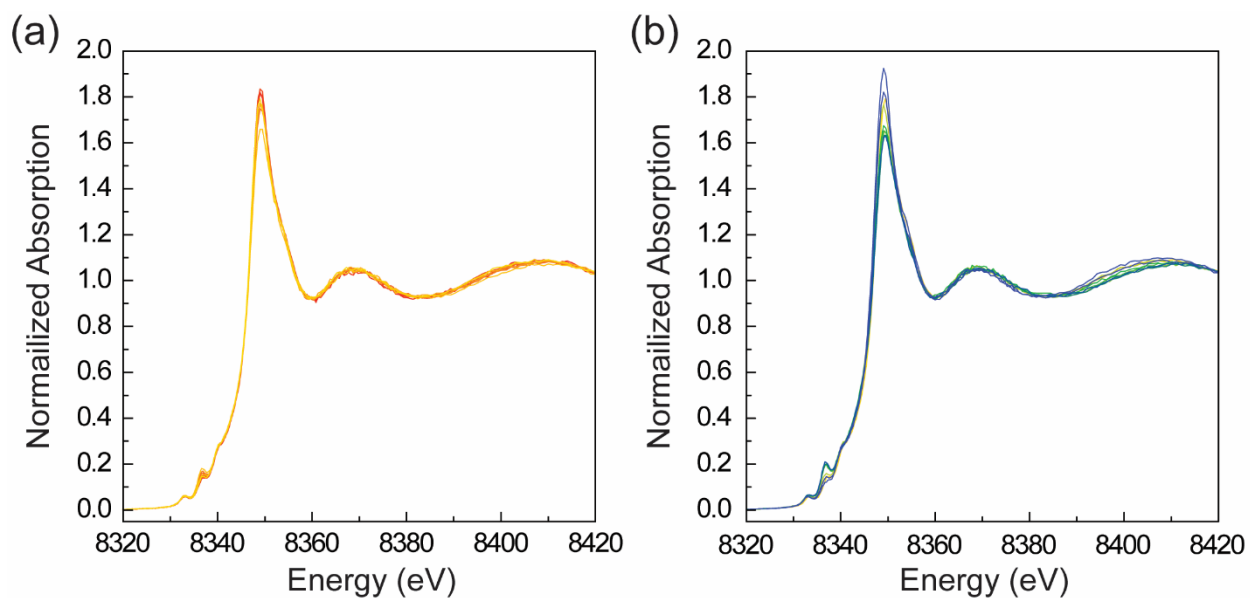

**Figure S1.** *Operando* X-ray absorption near edge structure (XANES) spectra at Ni K-edge of the Prussian blue (PB) analogue with iron replaced with nickel (PBN) during (a) discharging and (b) charging.

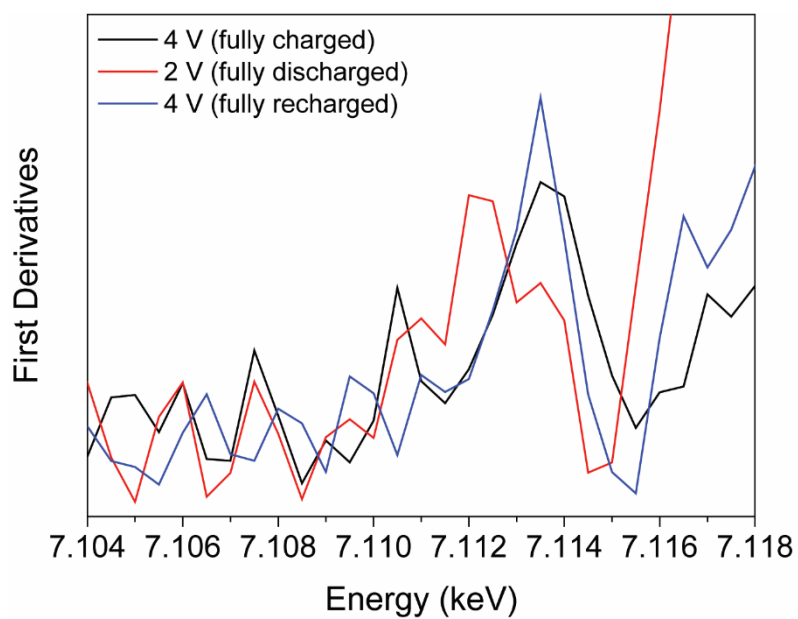

**Figure S2.** The first derivatives of the XANES spectrum of PB in a coin cell after charging, discharging and recharging.

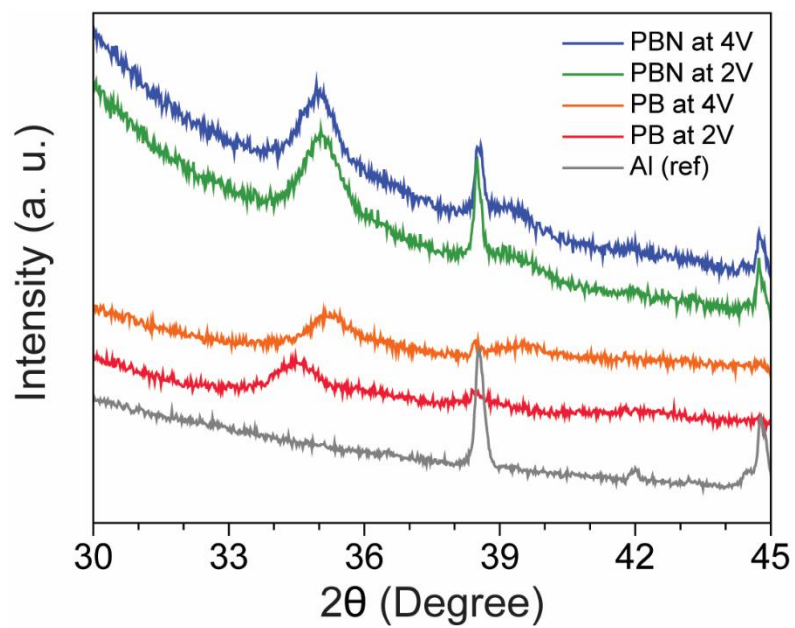

**Figure S3.** *Ex situ* X-ray diffraction (XRD) patterns of PB and PBN electrodes.

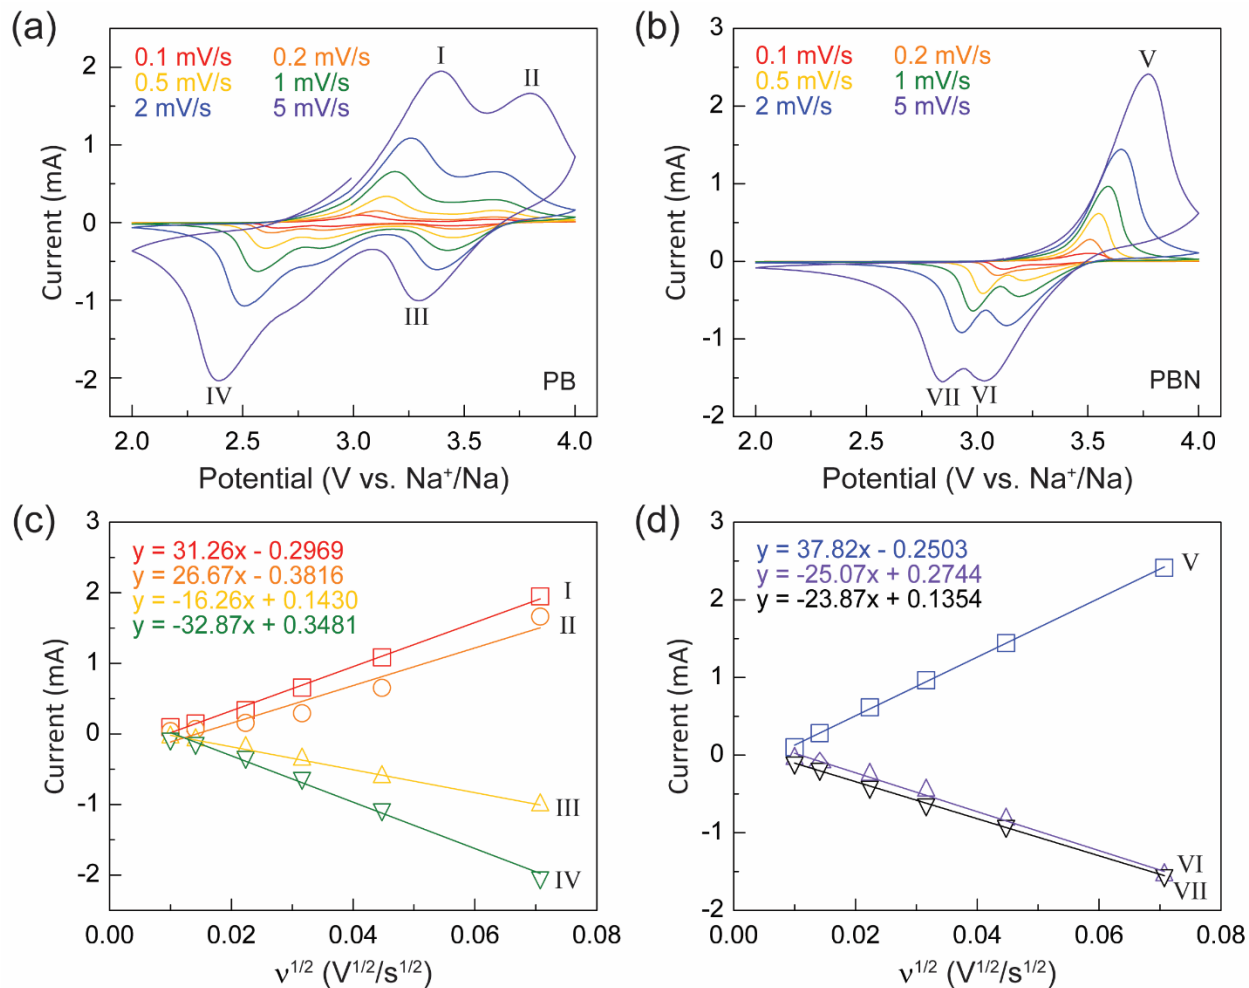

**Figure S4.** (a, b) Cyclic voltammetric profiles (CV) of the PB and PBN electrodes at various sweep rates and (c, d) the corresponding linear relationship between the anodic/cathodic peak currents and the square root of the sweep rate.

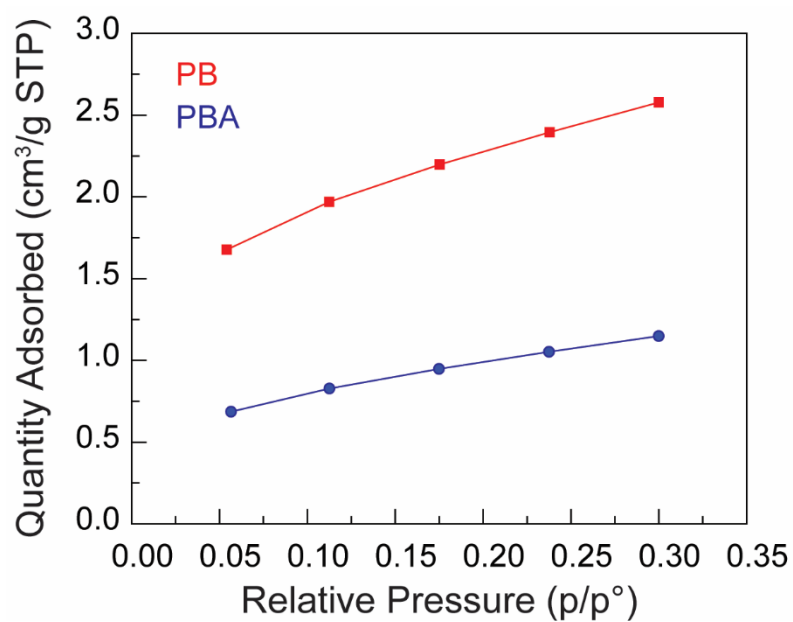

**Figure S5.** Brunauer-Emmett-Teller (BET) surface analysis of PB and PBN nanoparticles from nitrogen adsorption.

**Table S1.** The Calculated Lengths of the Cell Edges from *Ex Situ* XRD Patterns in Figure S3.

|   | PB       |          | PBN      |          |
|---|----------|----------|----------|----------|
|   | 4 V      | 2 V      | 4 V      | 2 V      |
| a | 10.207 Å | 10.396 Å | 10.264 Å | 10.235 Å |
| b | 10.096 Å | 10.838 Å | 10.274 Å | 10.383 Å |

**Table S2.** Calculated Diffusion Coefficients from the Randles–Sevcik Equation.

|     |     | $D$ (cm <sup>2</sup> s <sup>-1</sup> ) |
|-----|-----|----------------------------------------|
| PB  | I   | $1.6 \times 10^{-12}$                  |
|     | II  | $4.7 \times 10^{-12}$                  |
|     | III | $1.8 \times 10^{-12}$                  |
|     | IV  | $1.8 \times 10^{-12}$                  |
| PBN | V   | $1.0 \times 10^{-11}$                  |
|     | VI  | $3.7 \times 10^{-11}$                  |
|     | VII | $3.2 \times 10^{-11}$                  |
